# Supplementary material
Source: Elsevier journal article supplement (https://comptes-rendus.academie-sciences.fr/geoscience/article/10.1016/j.crte.2018.09.004/file/attach/mmc1.pdf)
Supplement: mmc1 [file mmc1.pdf]

## SUPPORTING INFORMATION

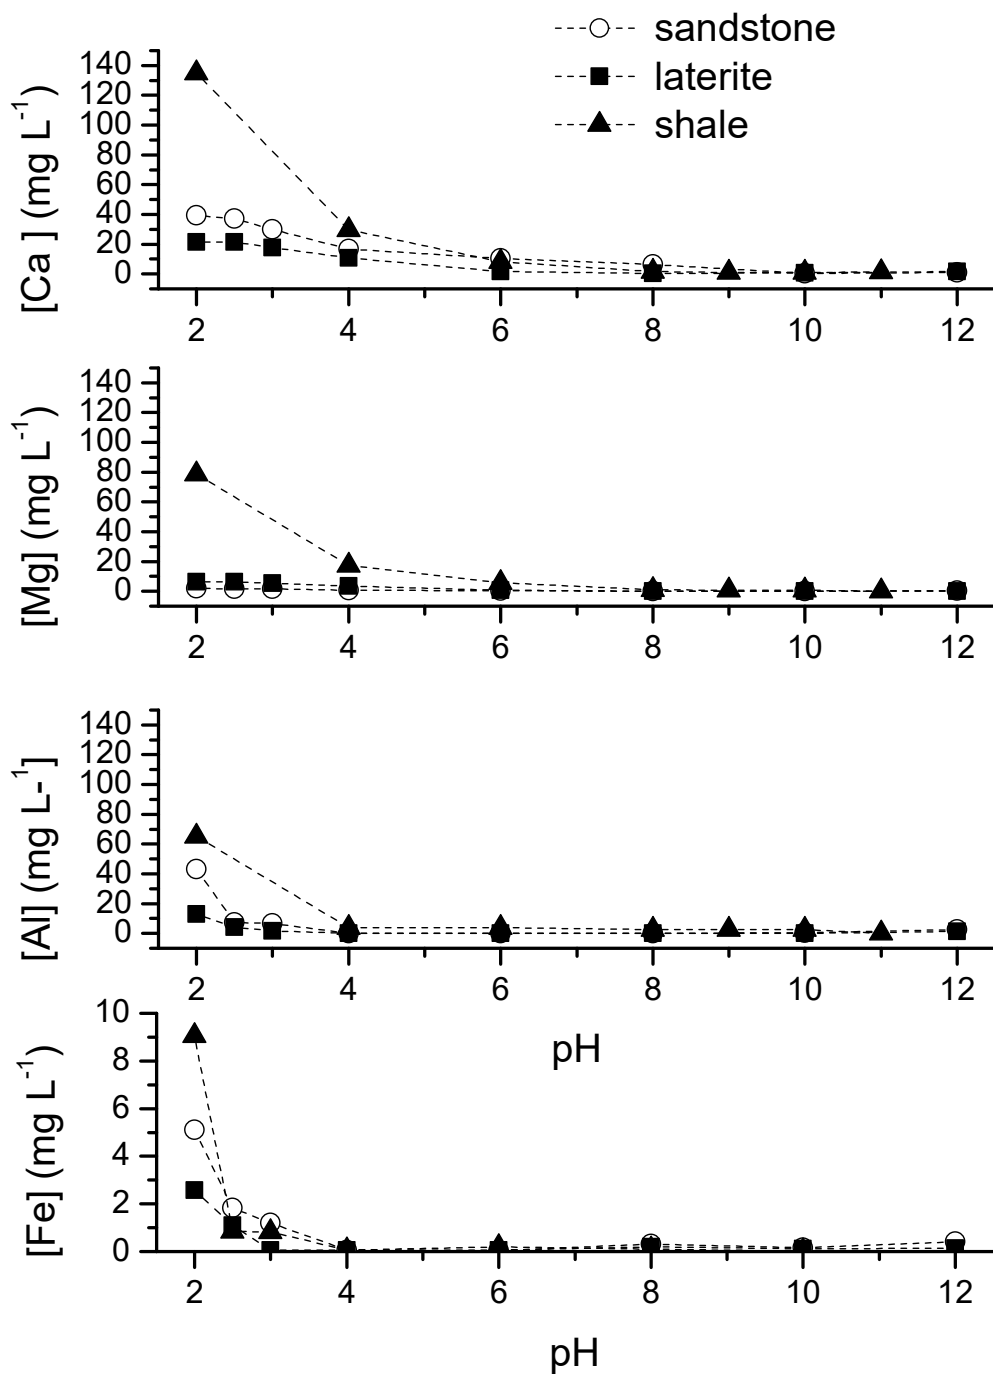

**Fig. S1:** Ion concentrations in solution in blank experiments (without PO<sub>4</sub>) as a function of pH ([adsorbent] = 80 g·L<sup>-1</sup>; time contact: 24 h).

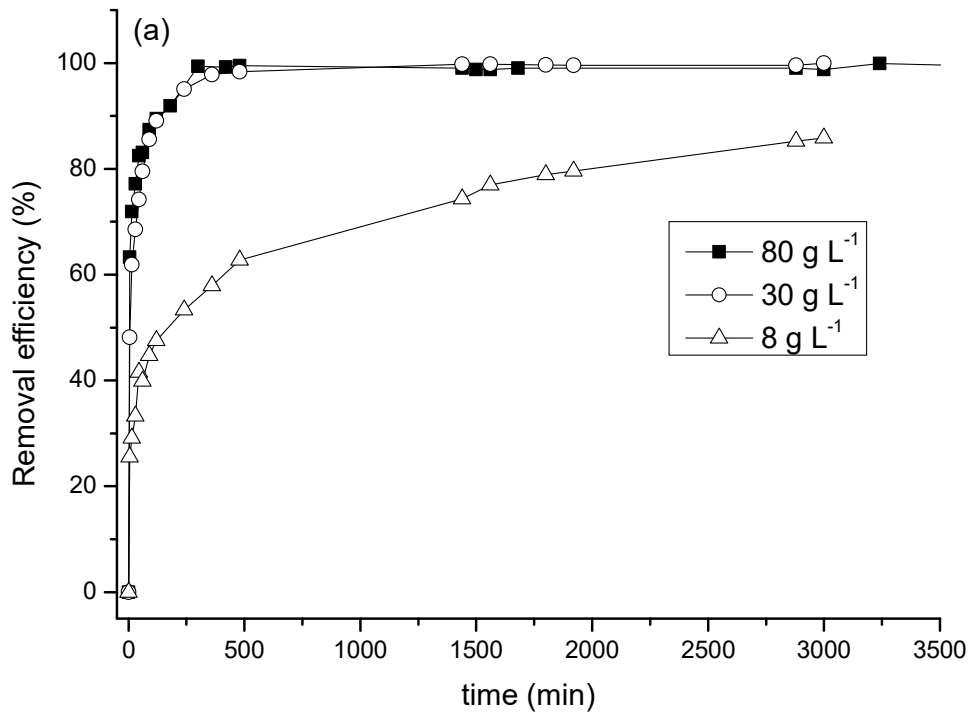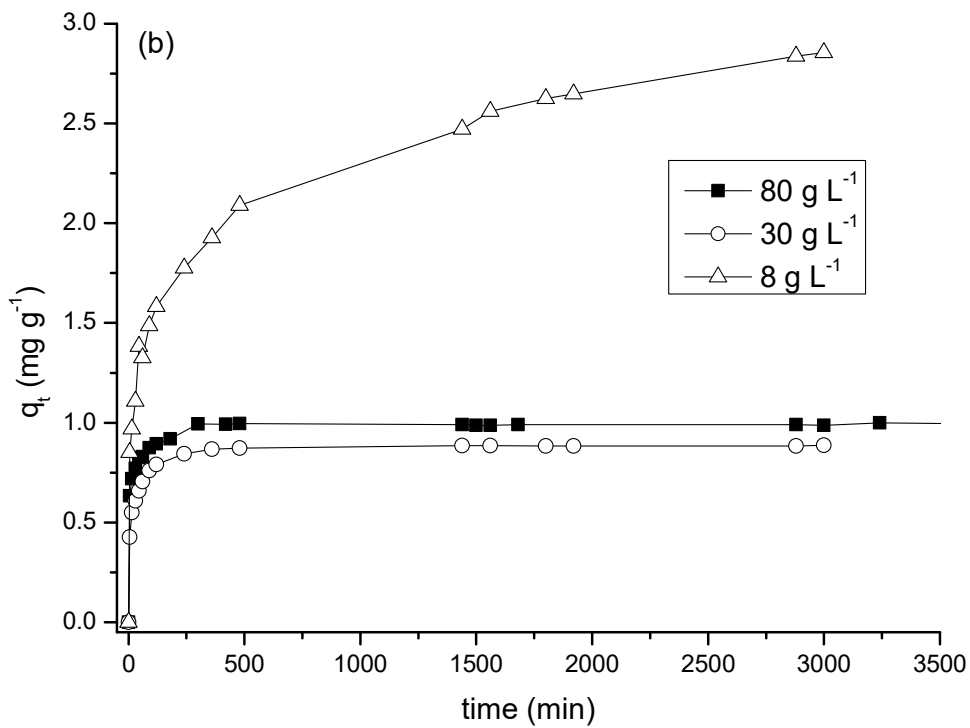

**Fig S2:** Effect of contact time and sandstone dose on phosphate removal efficiency (a) and phosphate uptake (b) ( $[\text{PO}_4]_{\text{initial}} = 25 \text{ mg}\cdot\text{L}^{-1}$ ; contact time: 24 h; granular fraction < 400  $\mu\text{m}$ ).

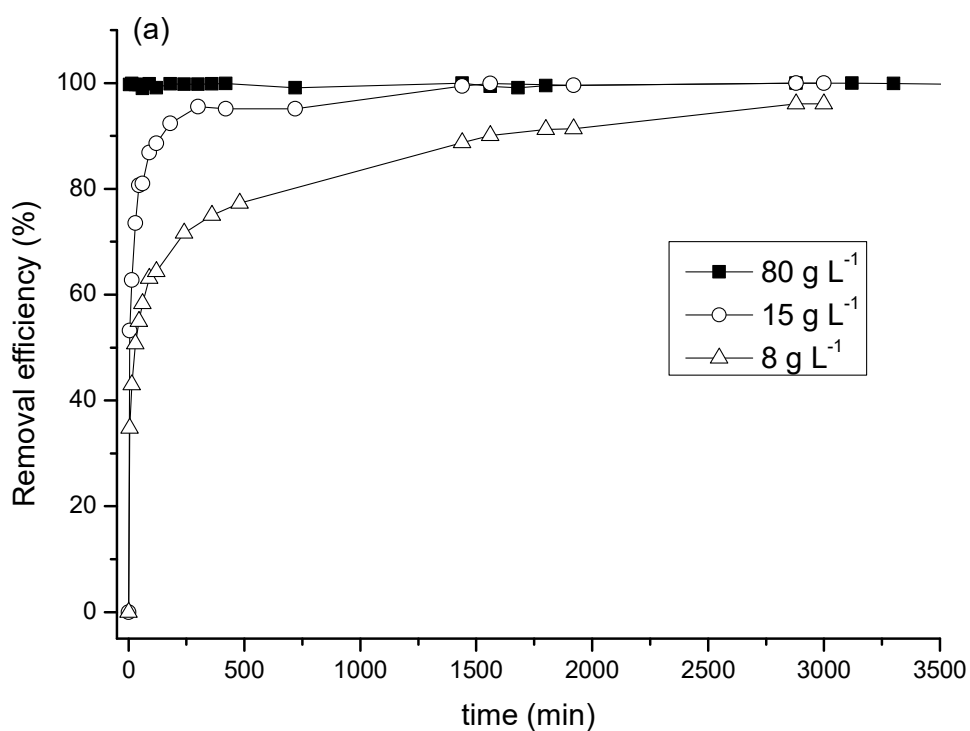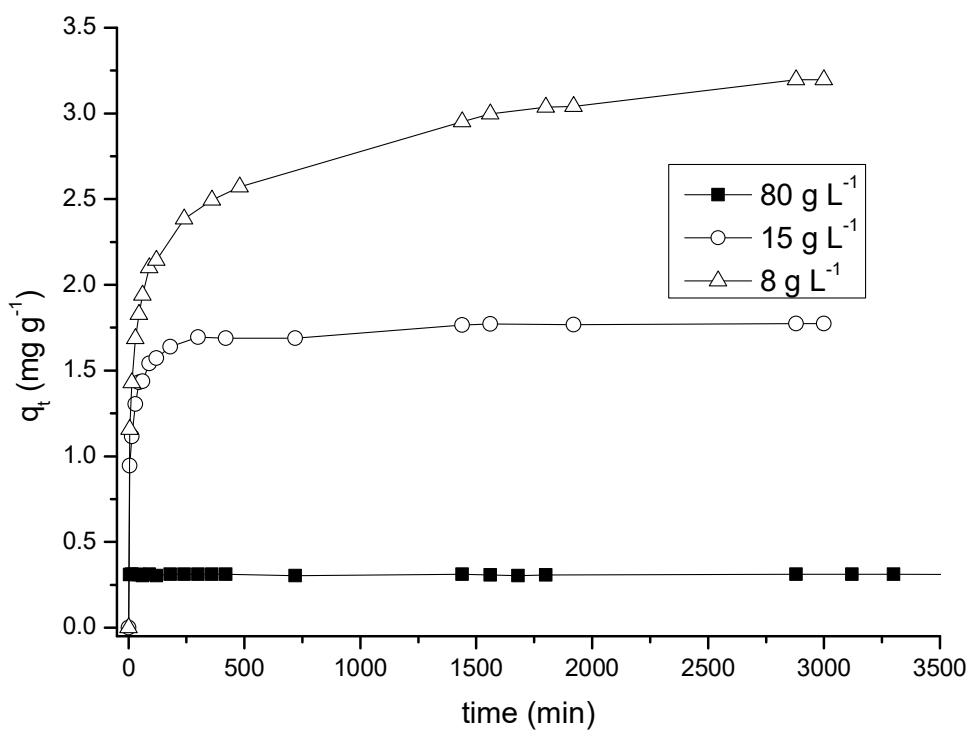

**Fig S3:** Effect of contact time and laterite dose on phosphate removal efficiency (a) and phosphate uptake (b) (Sorbent dose = 80 g·L<sup>-1</sup>; [PO<sub>4</sub>]<sub>initial</sub> = 25 mg·L<sup>-1</sup>; pH ~ 7; contact time: 24 h; granular fraction < 400 μm).

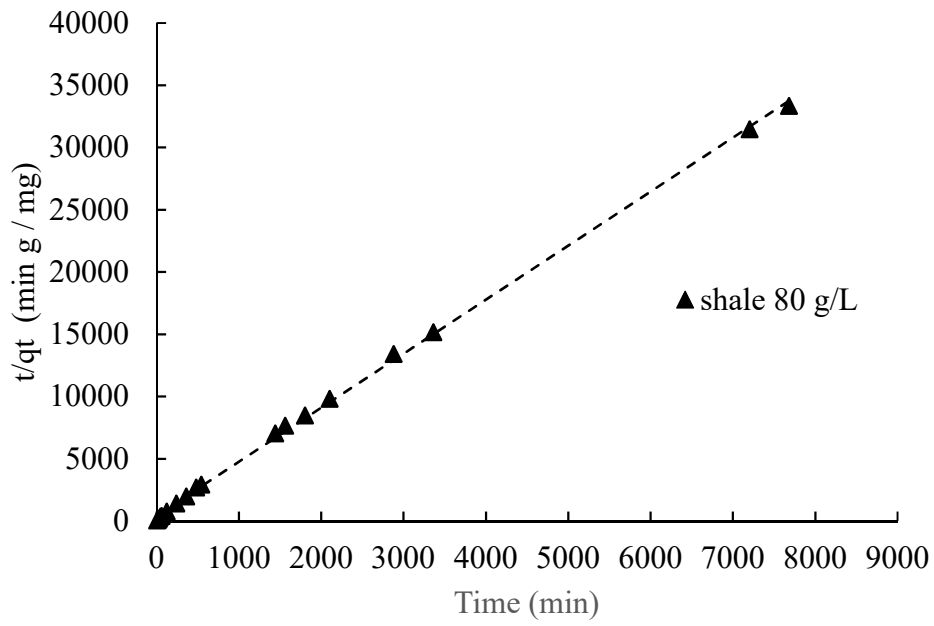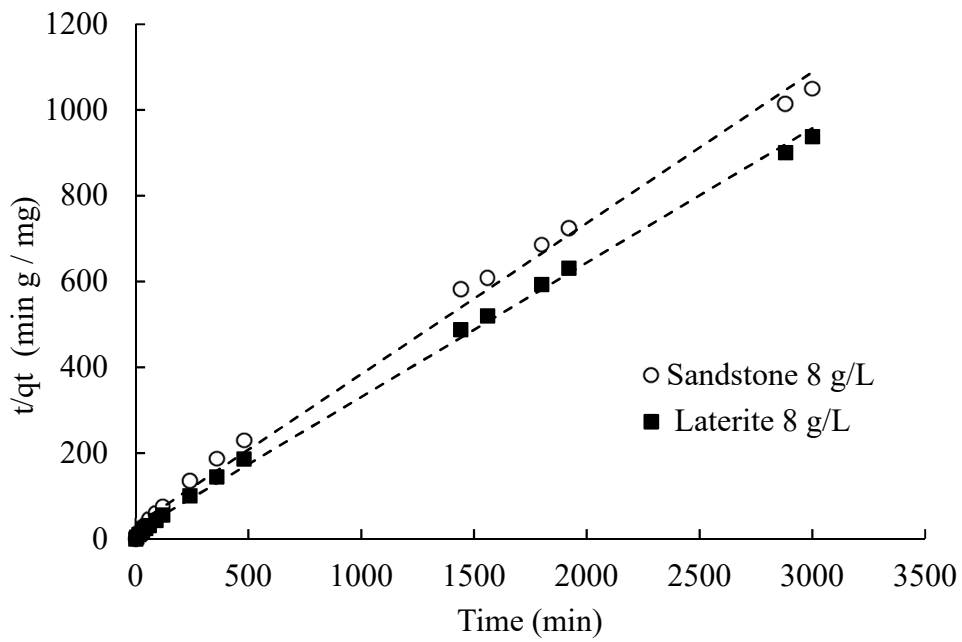

**Fig. S4:** Kinetics modelling of phosphate sorption onto shale (80 g/L) and sandstone and laterite (8 g/L) using a pseudo-second order model ( $[\text{PO}_4]_{\text{initial}} = 25 \text{ mg}\cdot\text{L}^{-1}$ ;  $\text{pH} \sim 7$ ; time contact: 24 h).

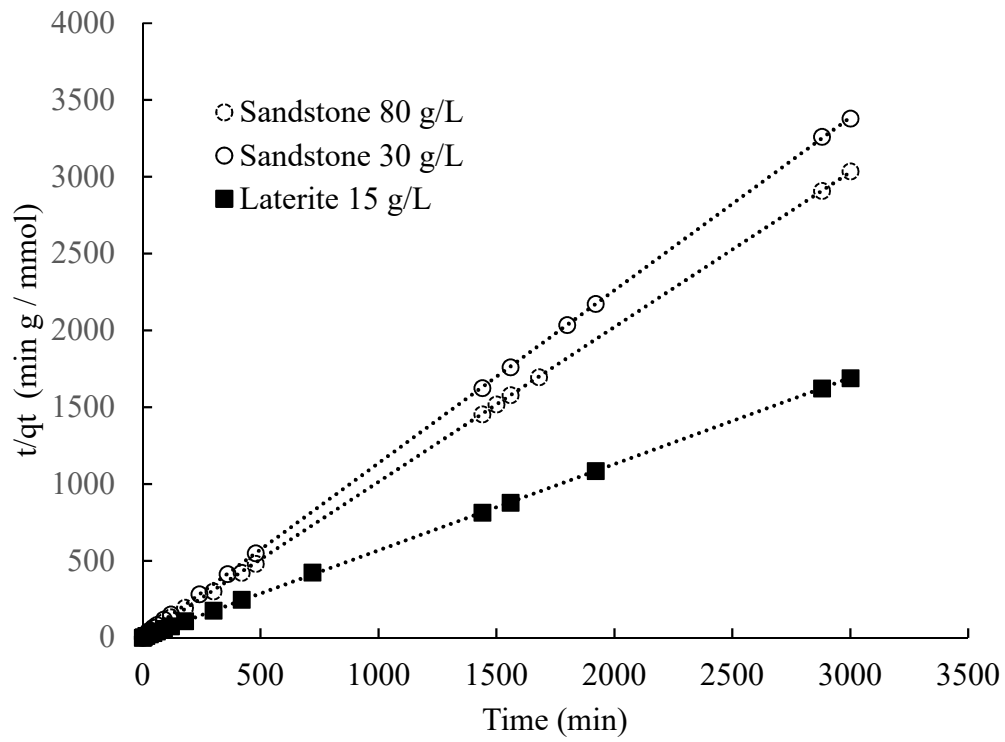

**Fig. S5:** Kinetics modelling of phosphate sorption onto sandstone (80 and 30 g/L) and laterite (15 g/L) using pseudo-second order model ( $[\text{PO}_4] = 25 \text{ mg}\cdot\text{L}^{-1}$ ;  $\text{pH} \sim 7$ ; time contact: 24 h).

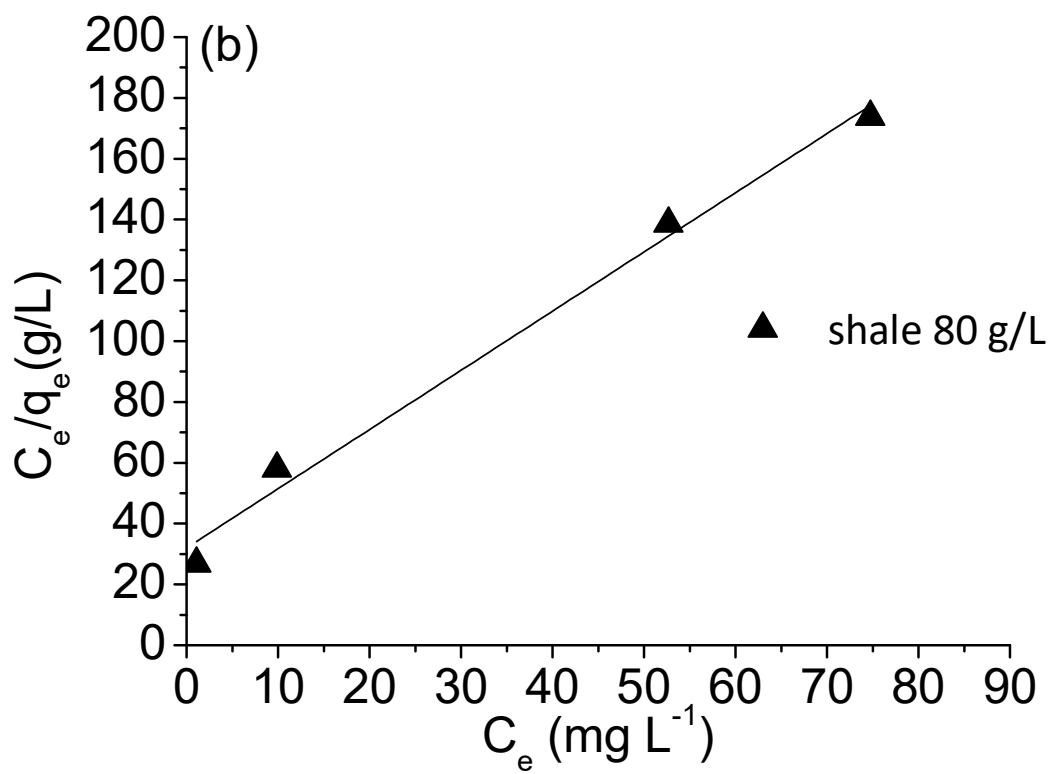

**Fig. S6:** Langmuir plot for phosphate sorption onto shale (b); (pH ~ 7; time contact: 24 h).

**Table S1** - Physical parameters of naturally occurring sandstone, laterite and shale samples from Ivory Coast. The porosity was determined in triplicate by a volumetric method which consisted to determine the volume of water ( $V_w$ ) required to saturate a known volume of shale ( $V_s$ ). The porosity ( $\varepsilon$ ) was obtained according the following formula  $\varepsilon = V_w/V_s \times 100$ . The particle-size distribution, on a weight basis was analyzed in triplicate by conventional dry-sieving techniques. The grain-size distribution plots were used to estimate  $d_{10}$  and  $d_{60}$  (10% and 60% of the material by weight is smaller than  $d_{10}$  and  $d_{60}$ , respectively). The uniformity of the particle-size distribution (the uniformity coefficient (CU)) was calculated as the ratio of  $d_{60}$  to  $d_{10}$ .

| Materials<br>(1–2 mm) | Physical characteristics |                  |                                  |      |                 |                 |                                                          |                                           |
|-----------------------|--------------------------|------------------|----------------------------------|------|-----------------|-----------------|----------------------------------------------------------|-------------------------------------------|
|                       | $d_{10}$<br>(mm)         | $d_{60}$<br>(mm) | Average<br>particle size<br>(mm) | CU   | Porosity<br>(%) | Bulk<br>density | Apparent<br>density<br>( $\text{g}\cdot\text{cm}^{-3}$ ) | $K^*$<br>( $\text{m}\cdot\text{s}^{-1}$ ) |
| Sandstone             | 1.87                     | 0.97             | 1.21                             | 0.52 | 52              | 2.60            | 1.26                                                     | $3.5\cdot 10^{-2}$                        |
| Laterite              | 1.84                     | 1.03             | 1.17                             | 0.56 | 51              | 2.35            | 1.15                                                     | $3.4\cdot 10^{-2}$                        |
| Shale                 | 1.80                     | 0.95             | 1.14                             | 0.53 | 50              | 2.40            | 1.14                                                     | $3.2\cdot 10^{-2}$                        |

\*Saturated hydraulic conductivity

**Table S2** - Chemical composition (wt %) of naturally occurring shale, sandstone and laterite samples from Ivory Coast.

|           | SiO <sub>2</sub> | Al <sub>2</sub> O <sub>3</sub> | Fe <sub>2</sub> O <sub>3</sub> | MnO   | MgO   | CaO  | Na <sub>2</sub> O | K <sub>2</sub> O | TiO <sub>2</sub> | P <sub>2</sub> O <sub>5</sub> | LoI* |
|-----------|------------------|--------------------------------|--------------------------------|-------|-------|------|-------------------|------------------|------------------|-------------------------------|------|
| Shale     | 56.8             | 17.5                           | 10.2                           | 0.6   | 2.1   | 0.4  | 0.9               | 2.4              | 1                | 0.1                           | 8.7  |
| Sandstone | 29.3             | 6.3                            | 54.4                           | <L.D. | <L.D. | 0.1  | <L.D.             | 0.1              | 0.3              | 1.0                           | 8.7  |
| Laterite  | 50.3             | 14.0                           | 24.5                           | 0.1   | 0.08  | 0.08 | 0.02              | 0.3              | 0.7              | 0.1                           | 9.9  |

\*Loss on ignition



**Table S3** - Mössbauer hyperfine parameters of the spectra of sandstone and laterite presented in Fig. 2. CS: center shift with respect to  $\alpha$ -Fe at room temperature;  $\Delta$ : quadrupole splitting or  $\mathcal{E}$ : quadrupole shift ; H: hyperfine magnetic field, and RA: Relative Area.

| Name      | Component                      | CS                                | $\Delta$ or $\mathcal{E}$         | H     | RA  |
|-----------|--------------------------------|-----------------------------------|-----------------------------------|-------|-----|
|           |                                | ( $\text{mm}\cdot\text{s}^{-1}$ ) | ( $\text{mm}\cdot\text{s}^{-1}$ ) | (kOe) | (%) |
| Sandstone | D1 ( $\alpha$ -FeOOH)          | 0.32                              | 1.07                              | –     | 19  |
|           | S1 ( $\alpha$ -FeOOH)          | 0.41                              | –0.17                             | 290   | 41  |
|           | S1 ( $\text{Fe}_2\text{O}_3$ ) | 0.37                              | –0.04                             | 491   | 40  |
| Laterite  | D1 ( $\alpha$ -FeOOH)          | 0.34                              | 0.55                              | –     | 55  |
|           | S1 ( $\alpha$ -FeOOH)          | 0.35                              | –0.26                             | 340   | 6   |
|           | S1 ( $\text{Fe}_2\text{O}_3$ ) | 0.66                              | –0.1                              | 500   | 20  |
|           | S1 ( $\text{Fe}_2\text{O}_3$ ) | 0.36                              | –0.09                             | 476   | 19  |

**Table S4** - Mössbauer hyperfine parameters of the spectra of shale, sandstone and grey presented in [Fig. 3](#). CS: center shift with respect to  $\alpha$ -Fe at room temperature;  $\Delta$ : quadrupole splitting or  $\mathcal{E}$ : quadrupole shift; H: hyperfine magnetic field, and RA: relative Area.

| Name      | $T$<br>(K) | Component                      | CS<br>( $\text{mm}\cdot\text{s}^{-1}$ ) | $\Delta$ or $\mathcal{E}$<br>( $\text{mm}\cdot\text{s}^{-1}$ ) | H<br>(kOe) | RA<br>(%) |
|-----------|------------|--------------------------------|-----------------------------------------|----------------------------------------------------------------|------------|-----------|
| Shale     | 12         | D1 ( $\text{Fe}^{3+}$ )        | 0.470                                   | 0.836                                                          | –          | 55        |
|           |            | D2 ( $\text{Fe}^{2+}$ )        | 1.272                                   | 2.71                                                           | –          | 14        |
|           |            | S1 ( $\alpha$ -FeOOH)          | 0.6                                     | –0.2                                                           | 480        | 23        |
|           |            | S2 ( $\alpha$ -FeOOH)          | 0.56                                    | –0.08                                                          | 500        | 8         |
| Sandstone | 9          | S1 ( $\alpha$ -FeOOH)          | 0,48                                    | –0.12                                                          | 497        | 51        |
|           |            | S2 ( $\text{Fe}_2\text{O}_3$ ) | 0,48                                    | –0.08                                                          | 532        | 49        |
| Laterite  | 9          | S1 ( $\alpha$ -FeOOH)          | 0.46                                    | –0.12                                                          | 502        | 28        |
|           |            | S2 ( $\alpha$ -FeOOH)          | 0.46                                    | –0.12                                                          | 487        | 32        |
|           |            | S3 ( $\text{Fe}_2\text{O}_3$ ) | 0.46                                    | –0.09                                                          | 532        | 40        |
|           |            | D1 (Fe(III))                   |                                         |                                                                |            | 3         |

**Table S5** - Kinetic models parameters for phosphate adsorption on laterite, sandstone and shale after reaction with an initial phosphate concentration of 25 mg·L<sup>-1</sup>.

|           |                           |                                        | Pseudo-first-order kinetic model (Eq. (3)) |                            |       | Pseudo-second-order kinetic model (Eq. (4)) |                                                |       |
|-----------|---------------------------|----------------------------------------|--------------------------------------------|----------------------------|-------|---------------------------------------------|------------------------------------------------|-------|
| Material  | Dose (g·L <sup>-1</sup> ) | $q_{\text{exp}}$ (mg·g <sup>-1</sup> ) | $q_{\text{calc}}$ (mg·g <sup>-1</sup> )    | $k_1$ (min <sup>-1</sup> ) | $R^2$ | $q_{\text{calc}}$ (mg·g <sup>-1</sup> )     | $k_2$ (g·mg <sup>-1</sup> ·min <sup>-1</sup> ) | $R^2$ |
| Laterite  | 15                        | 1.70                                   | 0.41                                       | 0.01                       | 0.703 | 1.78                                        | 0.041                                          | 0.999 |
|           | 8                         | 3.2                                    | 1.31                                       | 0.01                       | 0.926 | 3.2                                         | 0.006                                          | 0.998 |
| Sandstone | 80                        | 0.99                                   | 0.29                                       | 0.01                       | 0.927 | 0.99                                        | 0.51                                           | 1.000 |
|           | 30                        | 0.87                                   | 0.48                                       | 0.02                       | 0.963 | 0.89                                        | 0.10                                           | 1.000 |
|           | 8                         | 2.8                                    | 1.80                                       | 0.01                       | 0.800 | 2.84                                        | 0.01                                           | 0.990 |
| Shale     | 80                        | 0.21                                   | 0.07                                       | 0.01                       | 0.955 | 0.23                                        | 0.04                                           | 0.999 |

**Table S6** - Langmuir and Freundlich isotherm parameters for phosphate adsorption on shale (pH ~ 7; [shale] = 80 g/L; contact time: 24 h).

| Model             | Equation                                                | Parameters   |       |
|-------------------|---------------------------------------------------------|--------------|-------|
| <b>Langmuir</b>   | $\frac{C_e}{q_e} = \frac{C_e}{q_m} + \frac{1}{K_L q_m}$ | $R^2$        | 0.995 |
|                   |                                                         | $q_m$ (mg/g) | 0.514 |
|                   |                                                         | $K_L$ (L/g)  | 0.061 |
| <b>Freundlich</b> | $\ln(q_e) = \ln(K_f) + \frac{1}{n_f} \ln(C_e)$          | $R^2$        | 0.955 |
|                   |                                                         | $n_f$        | 2.02  |
|                   |                                                         | $K_f$ (L/g)  | 0.046 |
